# Supplementary material for: The glycoconjugate ontology (GlycoCoO) for standardizing the annotation of glycoconjugate data and its application
Source: PubMed Central journal article supplement (PMC8351504; doi:10.1093/glycob/cwab013), 2021-02-23
Supplement: glycocoo_supp_cwab013.pdf [file glycocoo_supp_cwab013.pdf]

Title:

The Glycoconjugate Ontology GlycoCoO for standardizing the annotation of glycoconjugate data and its application

Supplementary Materials

- Figures S1 UniCarbKB Glycans
- Figures S2 Glyconnect Glycans
- Figures S3 GlycoNAVI Glycans

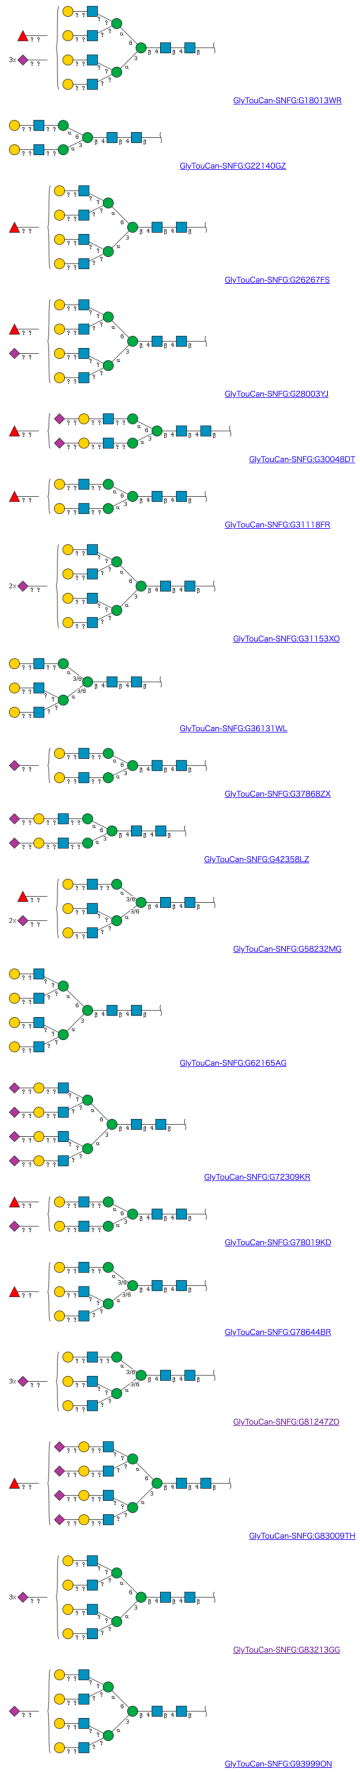

Figures S1 UniCarbKB Glycans

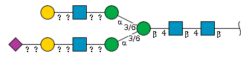

[GlyTouCan-SNFG:G04909DG](#)

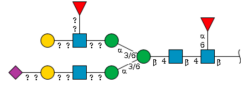

[GlyTouCan-SNFG:G06100FH](#)

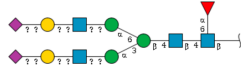

[GlyTouCan-SNFG:G08146BT](#)

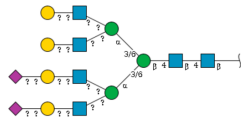

[GlyTouCan-SNFG:G11324RD](#)

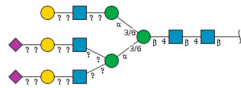

[GlyTouCan-SNFG:G14572XX](#)

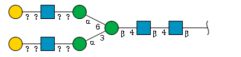

[GlyTouCan-SNFG:G22140GZ](#)

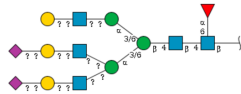

[GlyTouCan-SNFG:G22208HN](#)

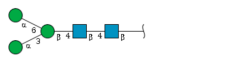

[GlyTouCan-SNFG:G22768VO](#)

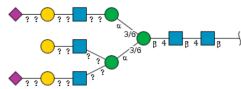

[GlyTouCan-SNFG:G29500SJ](#)

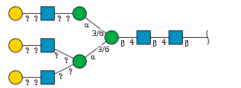

[GlyTouCan-SNFG:G36131WL](#)

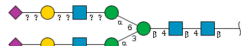

[GlyTouCan-SNFG:G42358LZ](#)

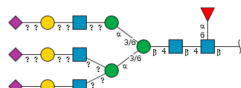

[GlyTouCan-SNFG:G51941GC](#)

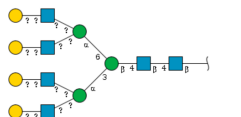

[GlyTouCan-SNFG:G62165AG](#)

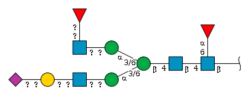

[GlyTouCan-SNFG:G75097UM](#)

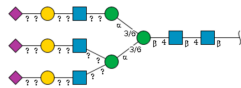

[GlyTouCan-SNFG:G93860XO](#)

Figures S2 Glyconnect Glycans

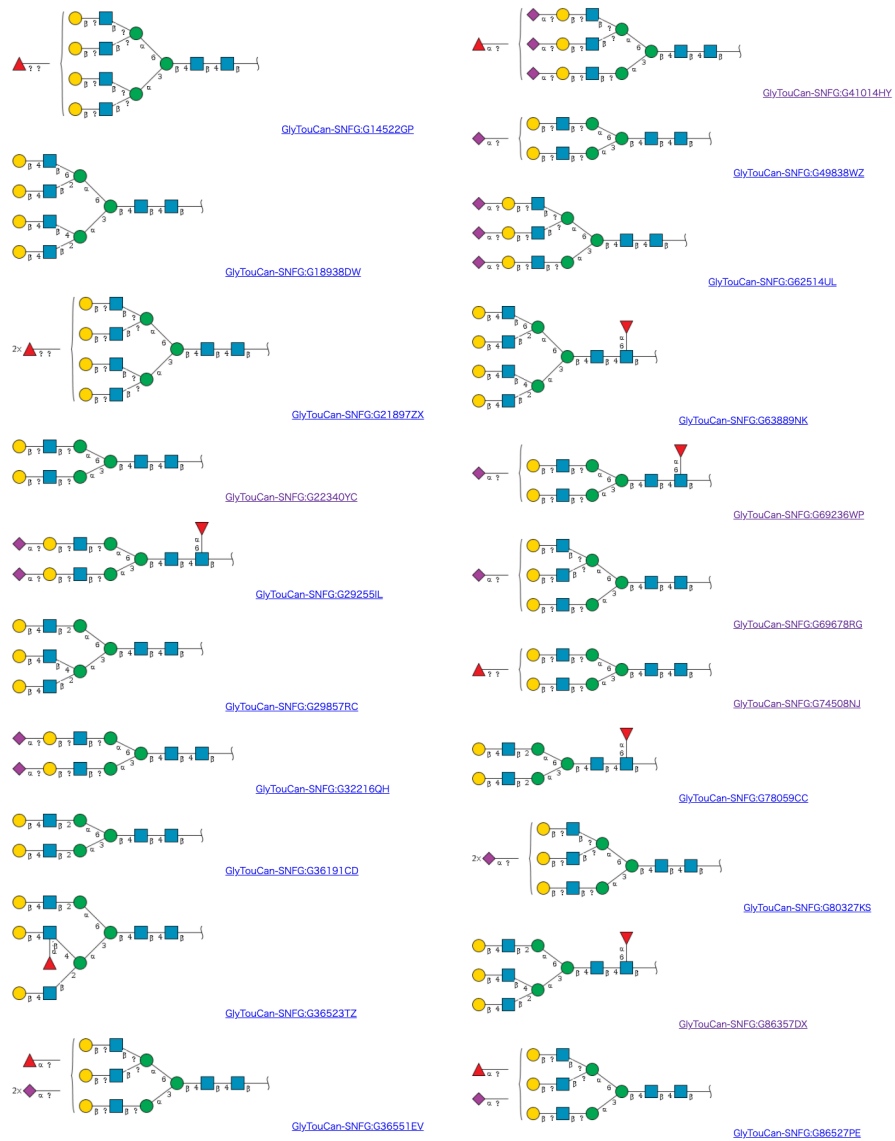

Figures S3 GlycoNAVI Glycans
